# Supplementary material for: Brilacidin as a Broad-Spectrum Inhibitor of Enveloped, Acutely Infectious Viruses
Source: MDPI journal article supplement (doi:10.3390/microorganisms12010054), 2023-12-28
Supplement: s1 [file s1]

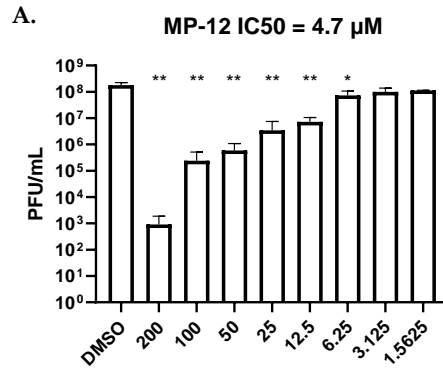

**Supplemental Figure S1.** Brilacidin affects MP-12 replication in Vero cells at varying concentrations. (A) Cells were pre-treated with brilacidin at varying concentrations along an 8 point curve. MP-12 was incubated for 1 hour following the same concentration scheme. Pre-treatment was removed and cells were infected with MP-12. After 1 hour, inoculum was removed and replaced with brilacidin containing media. All samples were compared with DMSO control group. Supernatants were collected 16 hours post-infection and viral titer was determined via plaque assay. A curve of inhibition was built and used to calculate inhibitor concentration 50% (IC<sub>50</sub>) of 4.7  $\mu$ M. \*  $p < 0.05$ , \*\*  $p < 0.01$ .

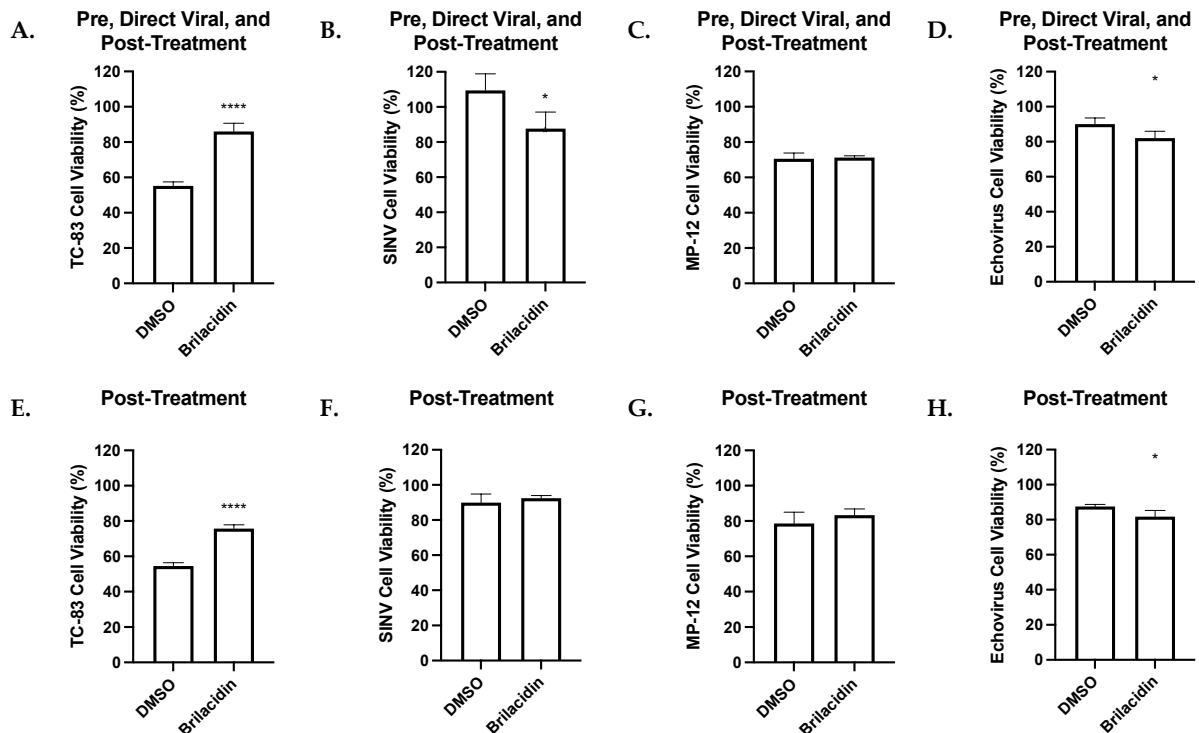

**Supplemental Figure S2.** Brilacidin affects cell viability during infection. (A-H) Effects of pre and post-treatment and direct viral brilacidin treatments on cell viability during infection with VEEV TC-83, SINV, RVFV MP-12 and Echovirus. (A-B, E-F) Vero cells, TC-83, and SINV were treated as described in Figure 1. After 18hpi cell viability was determined using CellTiter-Glo Luminescent Cell Viability Assay and compared to uninfected control. (C, G) HSAECs and MP-12 were treated as described in Figure 2. After 16hpi cell viability was determined using CellTiter-Glo Luminescent Cell Viability Assay and compared to uninfected control. (D, H) Vero cells and Echovirus were treated as described in Figure 4. After 24hpi cell viability was determined using

CellTiter-Glo Luminescent Cell Viability Assay and compared to uninfected control. Values are an average of 4 biological replicates  $\pm$  standard deviation. \*  $p < 0.05$ , \*\*\*\*  $p < 0.0001$ .
